# Human-environment feedback and the consistency of proenvironmental behaviour

Claire Ecotière\* <sup>1</sup>, Sylvain Billiard<sup>2</sup>, Jean-Baptiste André<sup>3</sup>, Pierre Collet<sup>4</sup>,  
Régis Ferrière<sup>† 5,6,7</sup>, and Sylvie Méléard<sup>†1,8</sup>

<sup>1</sup>Ecole Polytechnique, CNRS, Institut polytechnique de Paris, route de Saclay,  
91128 Palaiseau Cedex-France

<sup>2</sup>Univ. Lille, CNRS, UMR 8198 – Evo-Eco-Paleo, F-59000 Lille, France

<sup>3</sup>Institut Jean Nicod, Département d'études cognitives, ENS, EHESS, PSL  
Research University, CNRS, Paris France

<sup>4</sup>CPHT, CNRS, Ecole polytechnique, IP Paris, Palaiseau, France

<sup>5</sup>Institut de Biologie (IBENS), ENS-PSL, CNRS, INSERM, Paris, France

<sup>6</sup>Ecology and Evolutionary Biology, University of Arizona, Tucson, USA

<sup>7</sup>iGLOBES International Research Laboratory, CNRS, ENS-PSL, University  
of Arizona, Tucson, USA

<sup>8</sup>Institut Universitaire de France

July 22, 2022

---

\*corresponding author: [claire.ecotiere@polytechnique.edu](mailto:claire.ecotiere@polytechnique.edu)

<sup>†</sup>Co-senior authors

# 1 Abstract

2 Addressing global environmental crises such as climate change requires the adoption of con-  
3 sistent proenvironmental behaviour by a large part of a population. Identifying the main  
4 determinants of proenvironmental behavioural consistency remains challenging. Here, we ask  
5 how the individual assessment of environmental actions interacts with social norms to shape  
6 the degree of behavioural consistency, and how this feeds back to the perceived environmental  
7 state. We develop a stochastic individual-based model involving the coupled dynamics of a  
8 population and its perceived environment, assuming that individuals can switch between two  
9 alternate behaviours differing in their environmental impact. After showing that the system  
10 can be approximated by ordinary differential equations and associated fluctuations, we study  
11 the population-environment stationary state. We show that behavioural consistency depends  
12 on the balance between individual assessment and social interactions while being little sensi-  
13 tive to the environmental reactivity. Inconsistent proenvironmental behaviour caused by the  
14 environmental feedback can be countered by the social context provided the proenvironmental  
15 social norm is strong enough. Establishing such a social norm (through e.g. communication  
16 or public policy) thus appears critical for consistent proenvironmental behaviour. Noticingly,  
17 the combined social and environmental feedbacks then prove effective at establishing consistent  
18 proenvironmental behaviour even at high individual cost.

19 **Keywords:** Global change, stochastic model, social norms, timescales, fluctuations, payoffs

## 20 1 Introduction

21 Why don't we all act more decisively in the face of global environmental crises such as climate  
22 change or biodiversity loss? Achieving climate and biodiversity targets set by international  
23 agreements (e.g. Paris accord, Aichi convention) ultimately requires consistent behavioural  
24 changes across societies. At the level of individuals, limiting climate change or biodiversity loss  
25 requires to make consistent consumer choices with reduced net environmental impact. As citi-  
26 zens, individuals must consistently promote governmental policies that favor proenvironmental  
27 actions. Leaders and senior managers, as individuals, should make consistent decisions to influ-  
28 ence greenhouse gas emissions and natural resource use by large organizations and industries.  
29 For individuals, adopting proenvironmental behaviour is generally a difficult decision. Indeed  
30 the decision amounts to accepting certain short-term costs and reductions in living standards  
31 in order to mitigate against higher but uncertain losses that may be far in the future [14]. In-  
32 dividual behavioural responses to this collective-risk social dilemma [32] are not all-or-nothing,  
33 however. Between those who unconditionally accept or unconditionally deny the need for action  
34 towards environmental sustainability, the vast majority of people do not engage consistently in  
35 either way. Rather, non-ideologically polarized individuals tend to show inconsistent behaviour  
36 as they change opinion, revise their intention, or switch behaviour during their lifetime, possibly  
37 on very short timescales [7].

38 For example, individuals who engage in some kind of proenvironmental action may lose  
39 motivation to "take the next step". In this case, action limits intention for more, a pattern  
40 called *tokenism* [14]. In the same vein, the *rebound effect* occurs when some mitigating effort is  
41 diminished or erased by the individual's subsequent actions [15]. For example, after acquiring a  
42 more fuel-efficient vehicle (an active mitigating behaviour), owners tend to drive them farther,  
43 in effect reverting to their baseline environmental impact [28]. Other patterns of inconsistent  
44 behaviour involve responses to extreme climatic events. Exposure to a climate-related hazard  
45 such as wildfires increases support for costly, pro-climate ballot measures in subsequent local  
46 elections [20]. But the degree of personal concern about climate change is related to the  
47 temperature anomaly only over the past 12 months [10]. Thus, outside of the most politically  
48 polarized groups, the influence of environmental anomalies can be strong, but it decays rapidly  
49 [19].

50 Here we propose to analyse the individual dynamics of environmental behaviour in the con-  
51 text of behaviour-environment feedbacks [38]. In this framework, the environment is perceived  
52 by individuals as fluctuating and changing, while perceived environmental variations them-  
53 selves are shaped by individual opinions and actions. Schill and al.'s [38] framework builds on  
54 cognitive psychology, behavioural economics, and sustainability science, to develop the two-fold  
55 hypothesis: (i) individuals' opinions are made both in relative isolation, given the perceived  
56 environmental state, and in response to the socio-cultural context, through interactions with  
57 others; and (ii) the socio-cultural and environmental contexts change continuously as individ-

58 uals form opinions, make decisions, and act. Such a framework is needed to capture the fact  
59 that we create socio-cultural and environmental contexts that change dynamically with and  
60 feed back continuously to our behaviour.

61 Recently, several behaviour-environment models, akin to replicator models of game theory,  
62 have been analyzed where human behaviour and a natural resource such as farmland [12],  
63 water [41] or forest [4] jointly evolve. A key aspect of these behaviour-environment models  
64 based on 'imitation dynamics' [21] is that individuals' behavioural decisions are only made in  
65 the context of their interaction with others. When interacting with others, individuals evaluate  
66 the relative cost of their behaviour or intention, which may depend on the perceived state of  
67 the environment; and they respond to social norms (adhere to or reject a specific behaviour).  
68 Thus, such imitation dynamics model ignore the individual(istic) component of the decision,  
69 based on the perception of the environmental state and not directly tied to social encounters.  
70 Moreover, the time scales at which the social and environmental processes operate are not  
71 explicitly defined. This makes it difficult to interpret these models in terms of dynamics of  
72 *individual* behaviour.

73 Here we rigorously construct a simple mathematical model based on individual-level rules  
74 to investigate the determinants of individual proenvironmental consistency. In particular, we  
75 address how the individual assessment of environmental actions interacts with social norms to  
76 shape the degree of behavioural consistency, and how this feeds back to the perceived envi-  
77 ronmental state. To overcome the limitations of previous behaviour-environment models, our  
78 model assumes that any given individual impacts the environment to a degree determined by  
79 their behaviour, and the individual can change their behaviour stochastically in response to both  
80 social interactions and their own perception of the environment. In our model, behaviour can be  
81 inconsistent as the individuals can switch behaviour during their lifetime, because of individual  
82 assessment of the environmental state, or social pressure; reciprocally, the environmental state  
83 changes in response to individuals' behaviour. The environment and the individuals' behaviour  
84 are considered as continuous and discrete variables, respectively, and the different processes  
85 affecting the state of the behaviour-environment system play out on different time scales. We  
86 ask whether larger costs of, or weak social pressure on, proenvironmental behaviour make in-  
87 consistency more likely; and whether a slower pace of change in the perceived environmental  
88 state can promote consistency.

## 89 **2 Model**

90 We consider a population of size  $N$ . Individual behaviour and perceived environmental  
91 state are modeled on a short enough timescale such that  $N$  remains constant. The variable  $E$   
92 measures the perceived environmental state on a continuous scale, with larger  $E$  meaning that  
93 the environment is perceived as more degraded. Each individual can express two behaviours:  
94 baseline (denoted by  $B$ ) and active (denoted by  $A$ ). When expressing the  $A$  behaviour, an

95 individual actively seeks to reduce their environmental impact compared to the baseline impact  
96 of the  $B$  behaviour. An individual in state  $A$  increases the perceived environmental impact of  
97 the population by an amount  $l_A$ , which is less than the environmental impact,  $l_B$ , of behaviour  
98  $B$  (per capita). Any individual may switch between behaviours  $A$  and  $B$ .

99 At any time  $t$ , the perceived environmental state and the numbers of individuals who are  
100 performing  $A$  or  $B$  are denoted by  $E_t^N$ ,  $N_t^{A,N}$  and  $N_t^{B,N}$ , respectively. Since the population size  
101 is constant we have  $N_t^{B,N} = N - N_t^{A,N}$ . Hereafter we derive a model for the joint dynamics of the  
102 frequency of the  $A$  behaviour in the population,  $X_t^N = \frac{N_t^{A,N}}{N}$ , and the perceived environmental  
103 state,  $E_t^N$ . Notations of the model are summarized in Tab. 1.

## 104 2.1 Environment dynamics

We assume that the dynamics of the perceived environmental state  $E_t^N$  follows a deterministic continuous process. Each individual in the population has the same perception of the environment. The dynamics of  $E_t^N$  is driven by the ordinary differential equation

$$\dot{E}_t^N = h(X_t^N, E_t^N),$$

where  $h$  captures the environmental impact of the two behaviours given their frequency, according to

$$h(x, e) = \ell e(l_A x + l_B(1 - x) - e). \quad (1)$$

105 Parameter  $\ell$  represents the timescale at which individuals' behaviour affects the perceived  
106 environmental state  $E_t^N$ : the higher  $\ell$ , the faster the perceived environmental state changes due  
107 to individuals' behaviour.

108 The function  $h$  is chosen such that in a population where all individuals express behaviour  
109  $A$  ( $B$ , respectively), the rate of change of the environment perceived as minimally (maximally)  
110 degraded is proportional to  $l_A$  ( $l_B$ ) and the stationary value of the perceived environmental state  
111 is  $l_A$  ( $l_B$ ). In a population where both behaviours are expressed, the perceived environmental  
112 state varies between  $l_A$  and  $l_B$ .

## 113 2.2 Behaviour dynamics

114 Two factors influence individual behaviour: social interactions and individual assessment of  
115 the environmental state.

### 116 Social interactions

117 Any individual may at any time switch between behaviours  $A$  and  $B$  as a result of social  
118 interactions. The rate at which an individual changes its behaviour in the context of social

119 interactions depends on the attractiveness of the alternate behaviour, which is determined by  
 120 the perceived payoff differential between the two behaviours, and the social norm.

Formally, an individual with behaviour  $i$  switches to behaviour  $j$  via social interactions at rate

$$\lambda_{i \rightarrow j}^N(X^N) = N^2 \kappa X^N (1 - X^N) \lambda_j^N(X^N), \quad (2)$$

where  $\lambda_i^N(x)$  is the individual attractiveness of behaviour  $i$ ,  $N^2 \kappa X^N (1 - X^N)$  is the number of potential encounters, and  $\kappa$  is a scaling parameter controlling the rate of switching behaviour via social interactions. For example, only a fraction  $\kappa$  of the total population may be observable by any given individual at any given time. The individual attractiveness of behaviour  $i$  is taken of the form

$$\lambda_i^N(X^N) = \frac{1}{N} (\gamma_i + \delta_i g_i(X^N)), \quad (3)$$

where  $\gamma_i$  is the payoff from adopting behaviour  $i$ , and  $\delta_i$  is the social pressure for behaviour  $i$ . As a result, the individual rate of behavioural switch from  $i$  to  $j$  is

$$\lambda_{i \rightarrow j}^N(X^N) = N \kappa X^N (1 - X^N) (\gamma_j + \delta_j g_j(X^N)). \quad (4)$$

We further assume

$$\begin{aligned} g_A(X^N) &= X^N, \\ g_B(X^N) &= 1 - X^N \end{aligned} \quad (5)$$

121 reflecting that social influence is a coercive mechanism which encourages conformism.

## 122 Individual assessment

Any individual may also switch behaviour at any time based on their assessment of the state of the environment. Such behavioural switch occurs at the individual rate

$$\tau_{i \rightarrow j}^N(X^N, E^N) = N g_i(X^N) \tau_j(E^N), \quad (6)$$

where  $g_A(X^N) = X^N$  and  $g_B(X^N) = 1 - X^N$  (as above).  $\tau_A$  and  $\tau_B$  must capture the fact that individuals tend to adopt the alternate behaviour when they perceive the environmental impact of their current behaviour as relatively high, compared to the alternate behaviour. The simplest form then is

$$\begin{aligned} \tau_A(E^N) &= \tau(E^N - l_A) \\ \tau_B(E^N) &= \tau(l_B - E^N) \end{aligned} \quad (7)$$

123 where parameter  $\tau$  sets the timescale of behavioural switch from individual assessment.

## 124 2.3 Dynamics of the behaviour-environment stochastic process

125 The dynamics of the coupled behaviour-environment process  $(X_t^N, E_t^N)$  are stochastic, driven  
 126 by the probabilistic events of individual switch between the baseline ( $B$ ) and active ( $A$ ) be-

127 haviours, under the joint effects of social interactions and individual assessment, and the de-  
 128 terministic response of the perceived environmental state. Mathematically, the effects of all  
 129 possible events (individual behavioural switches, change in perceived environment) on the  
 130 state of the Markovian system  $(X_t^N, E_t^N)_{t \geq 0}$  are captured by the infinitesimal generator  $L^N$   
 131 of the stochastic process  $(X_t^N, E_t^N)$ . For  $(x, e) \in \llbracket 0, \frac{1}{N}, \dots, 1 \rrbracket \times \mathbb{R}_*^+$  and a test function  
 132  $f \in \mathcal{C}_b^1(\llbracket 0, \frac{1}{N}, \dots, 1 \rrbracket \times \mathbb{R}_*^+, \mathbb{R})$ , we have

$$\begin{aligned}
 L^N f(x, e) = & N^2 \kappa x (1-x) \lambda_A^N(x) \left[ f\left(x + \frac{1}{N}, e\right) - f(x, e) \right] \\
 & + N^2 \kappa x (1-x) \lambda_B^N(x) \left[ f\left(x - \frac{1}{N}, e\right) - f(x, e) \right] \\
 & + N(1-x) \tau_A(x, e) \left[ f\left(x + \frac{1}{N}, e\right) - f(x, e) \right] \\
 & + Nx \tau_B(x, e) \left[ f\left(x - \frac{1}{N}, e\right) - f(x, e) \right] \\
 & + h(x, e) \frac{\partial f(x, e)}{\partial e}.
 \end{aligned} \tag{8}$$

133 Individuals switch behaviour at a given time  $t$  for a given state of the system  $(X_t, E_t)$  with a  
 134 probability given by Eq. (8). In this expression, the first and second rows account for individual  
 135 behavioural switches due to social interactions (from  $B$  to  $A$  or  $A$  to  $B$ , respectively). For  
 136 instance, the rate at which a  $B \rightarrow A$  switch occurs because of social interactions (first row)  
 137 is proportional to  $N(1-x)$ , the number of individuals adopting behaviour  $B$ ;  $\kappa Nx$ , the rate  
 138 of social interaction between a single individual adopting  $B$  and individuals adopting  $A$ ; and  
 139  $\lambda_A(x)$ , the social attractiveness of a single individual adopting  $A$ . The third and fourth rows  
 140 account for switches because of individual assessment of the perceived environment state. For  
 141 instance, the rate at which a  $B \rightarrow A$  switch occurs because of the environment (third row)  
 142 is proportional to  $N(1-x)$ , the number of individuals adopting  $B$ ; and  $\tau_A(x, e)$ , the rate at  
 143 which an individual in state  $B$  adopts the alternative behaviour  $A$  after assessing the impact  
 144 of its behaviour on the perceived state of the environment. Finally, the last row accounts  
 145 for changes in the perceived environmental state depending on the frequency. The process  
 146 defined by Eq. (8) is called a Piecewise Deterministic Markov Process where the population  
 147 state (frequencies of behaviours) probabilistically jumps at each change in individual behaviour  
 148 while the environmental state deterministically and continuously changes between jumps.

149 Equation (8) captures the fact that individuals' behaviour is generally inconsistent, *i.e.* in-  
 150 dividuals can change their behaviour depending on their ecological and social environments,  
 151 and their own experience [13, 7]. For individual behaviour to be consistent, social interactions  
 152 with the alternate behaviour must be rare, the attractiveness of the alternate behaviour must  
 153 be low, and/or individuals rarely evaluate their behaviour against the perceived environment  
 154 state. Note that the model assumes that individuals do not differ in personality: all individuals  
 155 have the same intrinsic propensity to change their behaviour (or not) across time.

## 156 2.4 Dynamical system approximation for large populations

In the Supplementary Note [11], we provide a mathematical proof that, assuming that the population size  $N$  is very large, the sequence of stochastic processes  $(X^N, E^N)_{N \in \mathbb{N}^*}$  converges in distribution to the unique solution of the following system  $(x, e)$  of ordinary differential equations

$$\begin{aligned} \frac{dx}{dt} &= \kappa x(1-x)[\lambda_A(x) - \lambda_B(x)] + [\tau_A(e)(1-x) - \tau_B(e)x], \\ \frac{de}{dt} &= \ell e(l_A x + l_B(1-x) - e). \end{aligned} \quad (9)$$

with initial conditions denoted by  $(x_0, e_0)$ . The first equation governs the frequency  $x$  of the active behaviour,  $A$ . In the right hand side, the first term measures behavioural switch due to social interactions; the second term measures behavioural switch due to individual assessment. The second equation in System (9) drives the dynamics of the perceived environmental state,  $e$ . The terms  $\lambda_A(x)$  and  $\lambda_B(x)$  follow from Eq. (3), (4) and (5)

$$\begin{aligned} \lambda_A(x) &= \gamma_A + \delta_A x, \\ \lambda_B(x) &= \gamma_B + \delta_B(1-x) \end{aligned} \quad (10)$$

and  $\tau_A(e)$  and  $\tau_B(e)$ , from Eq. (7)

$$\begin{aligned} \tau_A(e) &= \tau(e - l_A), \\ \tau_B(e) &= \tau(l_B - e). \end{aligned} \quad (11)$$

In the rest of the paper, the payoff differential, or payoff difference between behaviours  $A$  and  $B$ , will be denoted by  $\beta$

$$\beta = \gamma_A - \gamma_B. \quad (12)$$

We say that the active behaviour  $A$  is *costly* when the payoff differential,  $\beta$ , is negative. The payoff differential may be positive if, for example, the active behaviour  $A$  is actually incentivized. Combining Eq. (10)-(12) in Eq. (9) lead to the following model equations

$$\begin{aligned} \frac{dx}{dt} &= \kappa x(1-x)[\beta + \delta_A x - \delta_B(1-x)] + \tau [e - l_A(1-x) - l_B x], \\ \frac{de}{dt} &= \ell e(l_A x + l_B(1-x) - e). \end{aligned} \quad (13)$$

157 We will denote the deterministic solution of Eq. (9) by  $(x, e)$ . If  $x$  converges to 1, individuals  
 158 perform behaviour  $A$  most of the time, which means that the individual switching rate from  $A$   
 159 to  $B$  vanishes. In other words, behaviour  $A$  is expressed consistently. If  $x$  converges to 0, the  
 160 individual switching rate from  $B$  to  $A$  vanishes and behaviour  $B$  is expressed consistently. In  
 161 all other cases, individual behaviour is inconsistent.



## 162 2.5 Quantifying the effect of individual stochasticity

163 Even though the individual rates of behavioural switching are deterministic functions, the  
 164 actual switches occur probabilistically. As a consequence, in a finite population the actual  
 165 proportion of the population expressing one or the other behaviour at any point in time departs  
 166 from the deterministic expectation. How much randomness there is in the behaviour's frequency  
 167 in the population can be evaluated by analysing the fluctuations of the stochastic model around  
 168 the deterministic limit.

To this end, we use the central limit theorem associated to the convergence of the stochastic process  $(X_t^N, E_t^N)_{t \in [0, T]}$  to the deterministic solution of Eq. (9). We therefore introduce  $(\eta_t^N)_{t \in [0, T]} = (\eta_t^{A, N}, \eta_t^{E, N})_{t \in [0, T]} = (\sqrt{N}(X_t^N - x_t, E_t^N - e_t))_{t \in [0, T]}$ , where  $(x, e)$  is the deterministic solution of Eq. (9) and  $(X^N, E^N)$  is the stochastic process. Assuming that  $\eta_0^N$  converges in law to  $\eta_0$ , when  $N \rightarrow \infty$ , the process  $(\eta_t^N)_{t \in [0, T]}$  converges in law to a Ornstein-Uhlenbeck type process  $(\eta_t)_{t \in [0, T]} = (\eta_t^A, \eta_t^E)_{t \in [0, T]}$  and we have

$$(X_t^N, E_t^N) = (x_t, e_t) + \frac{1}{\sqrt{N}}(\eta_t^A, \eta_t^E) + o\left(\frac{1}{\sqrt{N}}\right).$$

The process  $(\eta_t)_{t \in [0, T]} = (\eta_t^A, \eta_t^E)_{t \in [0, T]}$  satisfies,  $\forall t \in [0, T]$ :

$$\begin{aligned} \eta_t^A &= \eta_0^A + \int_0^t [(\kappa(1 - 2x_s)(\gamma_A - \gamma_B - \delta_B + (\delta_A + \delta_B)x_s) - \tau(l_B - l_A))\eta_s^A + \tau\eta_s^E] ds \\ &\quad + \int_0^t \sigma(x_s, e_s) dW_s, \\ \eta_t^E &= \eta_0^E + \int_0^t \ell[(l_A - l_B)e_s\eta_s^A + (l_A x_s + l_B(1 - x_s) - 2e_s)\eta_s^E] ds. \end{aligned} \quad (14)$$

where

$$\sigma(x, e) = \sqrt{\kappa x(1 - x)(\lambda_A(x) + \lambda_B(x)) + \tau_A(e)(1 - x) + \tau_B(e)x}, \quad (15)$$

169 and  $W$  is a standard Brownian motion (see Supplementary Note [11] for mathematical detail).

170 Note that the drift and variance are functions of the solution of the deterministic system  
 171 (9). The variance is the sum of the overall jump rates in the population and only affects the  
 172 behaviour frequency (not the perceived environmental state).

## 173 2.6 Simulations and numerical analysis

For the stochastic process, the dynamics of individual behaviours' frequency (by stochastic jumps) is jointly simulated with the dynamics of the perceived environment (by deterministic changes, continuously in time between the population stochastic jumps). Random times are for any  $N$  drawn according to an exponential distribution of parameters  $\xi^N$ , where

$$\xi^N > N \sup_{x, e} (\kappa(\lambda_A(x) + \lambda_B(x)) + \tau_A(e) + \tau_B(e)). \quad (16)$$

174 At each of these times, we update our variables of interest. There are three possible cases:  
175 either no individual changes their behaviour in the population, or one individual switches from  
176  $B$  to  $A$ , or one individual switches from  $A$  to  $B$ . The perceived environment is changed using  
177 a Euler scheme between two events in the population.

178 Without loss of generality, parameters  $\kappa$  and  $l_B$  are fixed to 1 (default values for parameters  
179 used in numerical analyses are summarized in Tab. 1). We analyse the properties of the  
180 stochastic and deterministic models for values of  $\delta_A$  and  $\gamma_A$  spanning the whole range of possible  
181 values while keeping  $\delta_B$  and  $\gamma_B$  constant. Parameters are varied across a discrete grid. We  
182 search for fixed points by computing the zeros of the polynomial given by Eq. (18). Local  
183 stability is tested by computing the Jacobian of the system. We use the Poincaré-Bendixson  
184 theorem to check the absence of limit cycle (Th.1.8.1 in [18], see also Supplementary Material  
185 [11]). When the existence of a stable limit cycle in addition to an attractive fixed point cannot  
186 be excluded, we simulate the dynamical system for different initial conditions. Would there be  
187 a limit cycle crossing the trajectory of the simulations, the trajectory would be trapped around  
188 the limit cycle and not converge to its stable fixed point. Otherwise, all trajectories converge  
189 to the equilibrium, thus excluding the existence of a limit cycle.

## 190 3 Results

191 We first describe the dynamics of the large-population model in the absence of environmental  
192 feedback ( $\tau = 0$  in Eq. (9)). When the environmental feedback is included, we investigate the  
193 effect of all parameters to identify those that control behavioural consistency: payoff differential,  
194 social norm threshold, individual environmental impacts and environmental impact differential,  
195 individual sensitivity to the environmental state, and reactivity of the environment. Then, we  
196 study the individuals behaviour and its variance at the stationnary state. Finally, we ask how  
197 incremental behavioural changes would affect the perceived environmental state.

### 198 3.1 Behaviour dynamics in the absence of environmental feedback

In the absence of environmental feedback (i.e. no individual assessment,  $\tau = 0$ ), individuals may switch behaviour only upon encountering other individuals, i.e. through social interactions. Equation (9) then reduces to the standard imitation dynamics (or replicator) equation

$$\frac{dx}{dt} = p_0(x) = \kappa x(1-x)[\beta + \delta_A x - \delta_B(1-x)]. \quad (17)$$

199 The model admits three fixed points,  $x_0^* = 0$ ,  $x_1^* = 1$  and  $x^* = \frac{\beta + \delta_B}{\delta_A + \delta_B}$ . If  $x^* < 0$  (resp.  
200  $x^* > 1$ ), then  $x_1^* = 1$  (resp.  $x_0^* = 0$ ) is globally stable. If  $0 < x^* < 1$ , then the system is  
201 bistable; convergence to  $x_1^* = 1$  occurs if the initial frequency of the active behaviour is higher  
202 than  $x^*$ . In other words, the whole population may stick to the active behaviour  $A$  either if  
203  $A$  is perceived as rewarding compared to  $B$  ( $\gamma_A > \gamma_B$ ) or, otherwise, if the cost of  $A$  is not

204 too large and the social pressure on behaviour  $A$  is strong enough ( $\gamma_A + \delta_A > \gamma_B$ ). When  
205 neither condition is satisfied, the baseline behaviour  $B$  will prevail in the population. Note that  
206 when the payoff differential  $\beta$  is null, the outcome is entirely determined by social pressures  
207 and in this case, the frequency threshold  $x^*$  is equal to  $\frac{\delta_B}{\delta_A + \delta_B}$ , a term that we call *social norm*  
208 *threshold*. In general ( $\beta \neq 0$ ), the probability of behavioural switch between  $A$  and  $B$  depends  
209 on the payoff differential,  $\beta$ , and the social norm threshold,  $\frac{\delta_B}{\delta_A + \delta_B}$ .

### 210 3.2 Effect of environmental feedback on behaviour dynamics

211 As expected, environmental feedback alone can explain behavioural inconsistency. By taking  
212  $\tau > 0$  in Eq. (7) and  $\kappa = 0$  in Eq. (9), individual behaviour is influenced by the perceived  
213 environmental state and not by social interactions. In this case, the Eq. (9) possesses only  
214 one stable equilibrium  $(x^*, e^*) = (\frac{1}{2}, \frac{l_B + l_A}{2})$ . Thus, as individuals switch behaviour, each of  
215 them will in the long run spend as much time adopting behaviour  $A$  as  $B$ , irrespective of  
216 the environment reactivity,  $\ell$ , or individual environmental impacts,  $l_A$  and  $l_B$ . With no social  
217 interactions ( $\kappa = 0$ ), the payoffs  $\gamma_A$  and  $\gamma_B$  do not affect the individuals' inconsistency either,  
218 since the payoffs only play a role when individuals can compare them, which is assumed to  
219 require social interactions.

By setting both  $\tau > 0$  in Eq. (7) and  $\kappa > 0$  in Eq. (9), the effect of environmental feedback  
combines with the effect of social interactions. As in the case without environmental feedback  
(cf. previous subsection), the model predicts up to three equilibria, given by the zeros of

$$p(x) = p_0(x) + \tau(l_B - l_A)(1 - 2x), \quad (18)$$

220 that are nonnegative and less than (or equal to) one. The effect of the environmental feedback  
221 on its own can be highlighted by comparing Eq. (17) at its stable equilibria with the value of  
222 Eq. (18) at the same state (i.e.  $x^* = 0$  or  $x^* = 1$ ). The effect of the environmental feedback  
223 is then given by the sign of  $p(0) = \tau(l_B - l_A) > 0$  and  $p(1) = -p(0) < 0$  showing that the  
224 equilibria of the system necessarily become internal, as illustrated by the disappearance of the  
225 yellow region between Fig. 1b to Fig. 2d.

226 The roots of Eq. (18) also show that the number of equilibria is likely influenced by the  
227 social interaction rate,  $\kappa$ , the payoff differential,  $\beta$ , the social norm threshold,  $\frac{\delta_B}{\delta_A + \delta_B}$ , and  
228 the combination (product) of the individual sensitivity to the environment,  $\tau$ , and differential  
229 environmental impact,  $l_B - l_A$ . Parameter  $\ell$ , the environment reactivity, does not affect the  
230 number of equilibria but it affects their stability.

231 The mathematical stability analysis of Eq. (18) finally shows that the combination of in-  
232 dividual sensitivity to the environment,  $\tau$ , and environmental impact differential,  $l_B - l_A$ , is  
233 indeed a key determinant of the system dynamics, qualitatively. When the product  $\tau(l_B - l_A)$

234 are small enough, there is one (globally stable) or three (two stable, one unstable) equilibria;  
235 the stable equilibrium always being close to  $x^* = 0$  or  $x^* = 1$ , or the two stable equilibria  
236 being close to  $x^* = 0$  and  $x^* = 1$ . When the product  $\tau(l_B - l_A)$  is large enough, there is  
237 only one equilibrium, this equilibrium can be stable or unstable (here necessarily a limit cycle)  
238 depending on environmental reactivity  $\ell$ . In other words, if the individual sensitivity to the  
239 environment is strong enough and/or the environmental impact differential is large, the model,  
240 as expected, predicts behavioural inconsistency, with individuals frequently switching between  
241 active and baseline behaviours. In contrast, with a relatively weak sensitivity to the environ-  
242 ment and a small environmental impact differential, the model predicts that individuals will  
243 adopt a consistent behaviour, either expressing the active behaviour most of the time, or the  
244 baseline behaviour most of the time.

### 245 **3.3 Conditions for propagation and consistency of active behaviour**

246 Figure 2 shows that environmental feedback by itself can cause behavioural inconsistency  
247 even when one of the behavioural options is highly beneficial. In contrast, active behaviours  
248 that are low-incentivized or even costly can be propagated and stabilized when the environmen-  
249 tal feedback is combined with strong conformism for the active behaviour. Indeed, on the one  
250 hand, low-incentivized active behaviour (i.e.  $\beta$  slightly positive) can be propagated uncondi-  
251 tionally (no bistability) and adopted consistently (yellow regions in Fig. 2a-c). If the individual  
252 sensitivity to the environment is low or the behavioural difference is sufficiently small (yellow  
253 vertical strip corresponding to  $\beta$  slightly positive in Fig. 2a-c), then the social norm threshold  
254 has a minor influence on the outcome; otherwise, the consistent adoption of low-incentivized  
255 active behaviour requires a low social norm threshold, i.e., strong enough conformism among  
256 active individuals (yellow area in the bottom right of Fig. 2d-f). On the other hand, the active  
257 behaviour can be propagated unconditionally (no bistability) and adopted consistently even  
258 if it carries a net cost (i.e. negative payoff differential), provided environmental reactivity is  
259 fast enough and the social norm threshold is sufficiently low, i.e., conformism among active  
260 individuals is strong enough (yellow area in bottom left of Fig. 2a-c).

261 Changing the balance between social interaction and individual assessment (i.e. the balance  
262 between the parameter  $\kappa$  and  $\tau$ ) affects the consistency of active behaviour. The higher  $\tau$  is, the  
263 more inconsistent the active behaviour gets (Fig. 2g-i). Each column of the Figure 2 illustrates  
264 a different balance between the parameter  $\kappa$  and  $\tau$ .

265 Decreasing environmental reactivity causes the globally stable equilibrium to lose its stability  
266 and be replaced with a limit cycle. In this case, individuals will switch behaviour at a rate  
267 that is itself changing over a slower timescale set by the environmental reactivity. The slow  
268 timescale of environmental reactivity creates a time lag between the perceived environmental  
269 state and individuals' behaviour, generating periodic oscillations in the switching rates.

### 270 **3.4 Behavioural inconsistency due to stochasticity at stationary** 271 **state**

272 The finite size of a population causes random fluctuations in the frequency of the behaviours,  
273 even asymptotically around the equilibrium values predicted by the deterministic model. The  
274 variance of the asymptotic fluctuations is always large when the environmental feedback is  
275 strongest (large product  $\tau(l_A - l_B)$ ), in relation with the equilibrium frequency being close  
276 to 0.5 (results not shown). With weaker environmental feedback, the asymptotic fluctuation  
277 variance is influenced by the payoff differential and the social norm threshold (Fig.(3)). It  
278 is relatively large for low positive payoff differential combined with medium to large social  
279 norm threshold (i.e. medium to low social pressure among active individuals) (lighter areas  
280 in Fig. 3). In contrast, the variance is very small at low values of the social norm threshold,  
281 irrespective of the payoff differential (dark blue horizontal strip at the bottom of Fig. 3a-c).  
282 In conclusion, behavioural inconsistency due to stochasticity at stationary state depends on  
283 a subtle balance between the payoff differential  $\beta$  and the social norm threshold,  $\frac{\delta_B}{\delta_A + \delta_B}$ . The  
284 variance at stationary state is the highest when the payoff differential and the social norm  
285 threshold have similar intensity but favour different behaviours.

### 286 **3.5 Robust environmental impact reduction through incremental** 287 **behavioural change**

288 Environmental feedback tends to generate behavioural inconsistency, which eventually limits  
289 the environmental impact reduction of active behaviour. This is especially true if the environ-  
290 mental impact differential is large (Fig. 4a,b), in which case active behavioural consistency  
291 in conjunction with a large environmental impact reduction can be achieved only if the social  
292 pressure in favor of the active behaviour is extremely strong (yellow horizontal strip at the bot-  
293 tom of Fig. 4a). However, by allowing for the unconditional propagation of low-incentivized or  
294 even costly active behaviour with a small environmental impact differential, the environmental  
295 feedback opens a path towards robust environmental impact reduction (Fig. 4c-f).

296 The general principle is to target a sequence of incremental behavioural change, each con-  
297 tributing a small reduction of environmental impact. According to the results presented in the  
298 previous subsections, an active behaviour  $A$  with a slightly smaller environmental impact than  
299 baseline behaviour  $B$  (small  $l_A - l_B$ ) will propagate and be expressed consistently provided  $A$   
300 is sufficiently incentivized (positive payoff differential,  $\beta > 0$ ) or its net cost (negative payoff  
301 differential,  $\beta < 0$ ) is compensated by social pressure (high enough  $\delta_A$  hence low  $\frac{\delta_B}{\delta_A + \delta_B}$ ). Once  
302 behaviour  $A$  is established, it becomes the common baseline behaviour where individuals may  
303 start expressing a new active behaviour  $A'$ , with lower environmental impact, and, in the worst  
304 case scenario, a larger cost. In the latter case, a stronger social pressure (higher  $\delta_A$  hence lower  
305  $\frac{\delta_B}{\delta_A + \delta_B}$ ) may compensate for the larger cost and ensure that the active behaviour  $A'$  propagates  
306 and becomes expressed consistently, instead of  $A$ .

307 Thus, in a system where social conformism for active behaviour can increase (increasing  $\delta_A$   
308 hence decreasing  $\frac{\delta_B}{\delta_A + \delta_B}$ ) in relation with more effective active behaviour (lower  $l_A$ ) and/or the  
309 perception of reduced environmental impact (lower  $E^*$ ), a substitution sequence of gradually  
310 more active (lower  $l_A$ ) and more costly (more negative  $\beta$ ) behaviours can take place, driving  
311 a significant decrease in the perceived environmental impact ( $E^*$  decreasing to arbitrarily low  
312 levels).

313 Finally, potentially small populations, social pressure on the more active behaviour is also an  
314 important factor of the robustness of this pathway towards reduced environmental impact. As  
315 shown in the previous section, the finiteness of the population generates stochastic fluctuations  
316 in behaviour frequency, and the amount of fluctuations is sensitive to social pressure (Fig. 3).  
317 While very little stochastic fluctuation is expected in the active behaviour frequency once costly  
318 active behaviour is established in conjunction with strong social pressure for this behaviour  
319 (negative  $\beta$ , high  $\delta_A$ , see dark blue horizontal strip at the bottom of Fig. 3a-c), the initial  
320 state and steps of the incremental sequence could be affected by the large fluctuations that are  
321 expected with a positive payoff differential and weak social pressure for  $A$  (large social norm  
322 threshold, see light areas in upper right region of Fig. 3a-c). Whether a new behaviour  $A'$   
323 more active than  $A$  could propagate in a system where  $A$  has not been adopted consistently  
324 (reflected by  $x$  significantly fluctuating away from 1) is beyond the scope of this model and  
325 warrants further mathematical investigation.

## 326 4 Discussion

327 In the face of global environmental crises such as anthropogenic climate change, many peo-  
328 ple who are not ideologically polarized may form proenvironmental intentions and yet fail to  
329 engage consistently in proenvironmental action. Using Schill and al.'s [38] conceptual frame-  
330 work of behaviour-environment feedbacks, we developed a simple mathematical model to study  
331 how social and environmental feedbacks jointly influence proenvironmental behavioural consis-  
332 tency. Individuals are modeled as agents who can engage in and switch repeatedly between  
333 two behaviours: the baseline behaviour  $B$  with environmental impact measured by  $l_B$  and the  
334 active behaviour  $A$  with (reduced) environmental impact  $l_A$ . As individuals interact among  
335 themselves and with their environment, they shape their social and environmental context; the  
336 social context then feeds back to individual behaviour via social interactions, while the state of  
337 the environment feeds back to behaviour via individual assessment. The social feedback is pos-  
338 itive: conformism tends to promote behavioural consistency among individuals expressing the  
339 same behaviour. The environmental feedback is negative: individuals favour proenvironmental  
340 behaviour when the environmental state is perceived as worsening; they are more likely to shift  
341 to baseline behaviour when the environmental state is perceived as improving. As expected,  
342 the negative environmental feedback by itself is a cause of behavioural inconsistency whereas  
343 the positive feedback of conformism can promote behavioural consistency.

344 To resolve the joint influence of these two feedbacks, we rescaled our stochastic individual-  
345 level model to obtain a macroscopic model of behaviour-environment dynamics. The macro-  
346 scopic model takes the form of a system of ordinary differential equations in the state variable  
347  $x$  (frequency of active behaviour at any time  $t$ ) and  $e$  (perceived level of environmental degra-  
348 dation at any time  $t$ ). This derivation, whereby a simple differential equation model is obtained  
349 rigorously from a stochastic model, highlights three important timescales in the system, which  
350 control the behaviour-environment dynamics: the timescale of social interactions, set by the  
351 encounter rate  $\kappa$ ; the timescale of individual assessment, set by parameter  $\tau$ ; and the timescale  
352 of change in the perceived environment, set by parameter  $\ell$ .

353 When the timescale of individual assessment is fast relative to social interactions, the envi-  
354 ronmental feedback dominates the system dynamics, maintaining inconsistent behaviour. The  
355 relative cost of proenvironmental behaviour has no influence on the outcome, which is also  
356 largely independent of the level of proenvironmental conformism. This is because both factors  
357 (set by the payoff differential  $\beta$  and the social norm threshold) only influence behavioural de-  
358 cisions in the context of social interactions. The relatively fast individual assessment timescale  
359 may originate from individuals having more confidence in their own evaluation of costs and  
360 benefits than in others' influence. This is known to occur, for instance, when the decision to  
361 be made carries a lot of personal weight [3, 33] or when individuals have grown up in a very  
362 favourable environment [24].

363 When individual assessment is slow compared to social interactions, the social feedback  
364 dominates. The outcome of social interactions is parametrized by the social norm threshold  
365 and the payoff differential,  $\beta$ . When analysed with respect to these two parameters, the coupled  
366 human-behaviour system dynamics are similar to the purely social interaction model, with  
367 stable equilibria (possibly coexisting in a bistable regime) corresponding to a behaviour that is  
368 consistently baseline or consistently active. However, the coupled human-environment system  
369 exhibits a notable difference: low-incentivized or even costly proenvironmental behaviour (i.e.  
370 small-positive or negative  $\beta$ ) can spread unconditionally (with respect to initial frequency)  
371 and be adopted consistently, provided the conformism of proenvironmental behaviour is strong  
372 enough. This raises the question of whether, in practice, social influence could be stronger  
373 among individuals who engage in proenvironmental behaviour than among individuals who do  
374 not. One can speculate that this could be the case if the active behaviour is individually costly  
375 and perceived as a moral duty. In this case, the active individuals behave as cooperators whose  
376 efforts (measured in terms of opportunity cost) are influenced the most by the observation of  
377 the others' efforts [35, 5].

378 Overall, the timescale of perceived environmental change has little effect on the behaviour-  
379 environment dynamics. Thus, whether individuals assume that their actions are environmen-  
380 tally meaningful in the short term (high environmental reactivity) or the long term (low envi-  
381 ronmental reactivity) generally has no significant effect on behavioural consistency. The case

382 of social interactions and individual assessment occurring on similar timescales is special, how-  
383 ever. In this case, low environmental reactivity creates a time lag between behavioural and  
384 environmental changes, causing behaviour-environment cycles when the proenvironmental be-  
385 haviour is costly and levels of conformism are not too different between behaviours. A similar  
386 effect of slow environmental reactivity relative to social interactions promoting oscillations was  
387 also detected by [40] in their model of forest growth and conservation opinion dynamics. Con-  
388 trasted environmental impacts of behaviours  $A$  and  $B$  (i.e. large  $l_B - l_A$ ) favour the limit  
389 cycle regime over bistability which is reminiscent of previous findings of behaviour-environment  
390 cycles replacing bistability when the human influence on the environment is strong [23].

391 A question of interest is how the magnitude of environmental impact reduction associated  
392 with the active behaviour affects consistency. The model shows that for active behaviours caus-  
393 ing only a small environmental impact reduction, the bistable regime is favoured, which leads to  
394 consistency (of behaviour  $A$  or behaviour  $B$ ). In fact, a small environmental impact reduction  
395 by the active behaviour has the same effect on the system dynamics as a slow timescale of  
396 individual assessment. Once such a 'small step' active behaviour is established consistently, the  
397 perceived level of environmental degradation is only decreased by a small amount; but if more  
398 behavioural options were available, the socio-environmental context would be set to promote  
399 individuals engaging consistently in 'the next small step'. If the process were repeated, leading  
400 to the consistent adoption of active behaviours of gradually smaller environmental impact, we  
401 would expect the perceived level of environmental degradation to decrease. Interestingly, this  
402 might happen even if the relative cost of active behaviour was increasing, provided conformism  
403 for active behaviour increased concomitantly.

404 Our consideration of gradual behavioural change through a sequence of 'small steps' raises  
405 the empirical question of whether the perceived change in environmental state could in turn  
406 affect the repertoire of individual behaviours, and in particular motivate behaviours more active  
407 than  $A$ . In practice, the existence and direction of such an additional feedback may depend  
408 on whether each small step is individually beneficial and thus considered by people as a self-  
409 serving decision, or individually costly and considered as a form of cooperation. In the first case,  
410 there is no obvious reason for the perceived change in environmental state to affect individual  
411 decisions, so it is unlikely that such feedback would exist. In the second case, however, the  
412 question relates to the rich empirical literature on the influence of the perceived environmental  
413 state on cooperation. The majority of studies in this field, and in particular the highest powered  
414 studies, report a positive relationship between the quality of the environment experienced by  
415 individuals and their level of investment in cooperation [25, 39, 2, 34, 30, 37, 45, 26]; although  
416 some studies report opposite effects [1, 27, 36] or no effect at all [42, 44]. We may thus  
417 hypothesize the existence of the additional positive feedback whereby the perception of an  
418 improved environmental state would enlarge the behavioural repertoire and motivate more  
419 active behaviours. The improvement or, on the contrary, the deterioration of the perceived  
420 environment could lead individuals to invest more, or, on the contrary, less in proenvironmental



421 behaviour, thus generating the kind of behavioural sequence that we envisioned in this analysis.

422 Our work builds on the fundamental distinction between the individual's stable character-  
423 istics and the subset of situational characteristics which capture the social and environmental  
424 situatedness of behaviour [9]. In the model, all parameters, except the rate of environmental  
425 reactivity,  $l$ , are set as individual characteristics. A key assumption is that all individuals are  
426 identical in their stable characteristics. Our framework could be extended to relax this assump-  
427 tion and investigate the consequences of diversity in individual social status or personalities [8,  
428 43]. For example, the same objective cost of the active behaviour (e.g. buying or maintaing an  
429 electric car) may be perceived very differently depending on the individual's wealth [31, 17].  
430 Likewise, individuals of different social status may vary in their experience of social pressure  
431 from individuals expressing the active vs. baseline behaviour; this in the model would manifest  
432 through inter-individual variation of  $\delta_A$  and  $\delta_B$  [24]. Given the predicted importance of the  
433 individual sensitivity to the environment,  $\tau$ , and environmental impact differential,  $l_A - l_B$ ,  
434 the outcome (consistency of the active behaviour) is likely to be influenced by inter-individual  
435 heterogeneity in these two parameters. It is known that individuals can differ greatly in their  
436 perception and assessment of the state of degradation of their environment, due to differences  
437 in social origin, education, or information [17, 16]; and in their potential proenvironmental  
438 response to perceived environmental degradation [16]. This heterogeneity could result in wide  
439 variation of both  $\tau$  and  $l_A - l_B$  among individuals, with contrasted personalities such as being  
440 little responsive and acting weakly (small  $\tau$  and  $l_A - l_B$ ), or responding fast and strongly (large  
441  $\tau$  and  $l_A - l_B$ ).

442 In previous human-environment models, the environment is a natural renewable resource  
443 such as forests [4] or fisheries [29], or physical variables such as atmospheric greenhouse gases  
444 concentration or temperature [6]. In these models, the environmental dynamics are driven by  
445 their own endogenous processes and impacted by human activities (harvesting, gas emissions...).  
446 These models typically ask how human behavioural feedbacks alter the stability properties of the  
447 perturbed (exploited, polluted...) ecosystem. An important difference between our approach  
448 and previous human-environment system models lies in our definition of the environmental state  
449 in terms of perceived information. This information changes under the influence of individuals'  
450 intentions or behaviours. This may be an actual, physical change, in the sense that some  
451 actual component of the environment is impacted by human behaviour; or it may be virtual  
452 (informational) as inferred from the distribution of behaviours in the population. Given this  
453 representation of the environmental state, we assumed the simplest behavioural response, a  
454 linear negative feedback. Psychological studies suggest that alternate or additional responses  
455 warrants further investigation, such as positive reinforcement (improved environmental state  
456 encourages to do more [22, 17]) or "giving up" (environment degradation leads to less effort,  
457 rather than more [22, 17]).

458 In conclusion, behavioural consistency depends on the balance between two different feed-  
459 backs: individual assessment and social interactions. The model highlights the importance of  
460 the timescales for these two feedbacks and provides valuable information in reinforcing pro-en-  
461 vironmental behaviour. In order to promote consistency in pro-environmental behaviour, en-  
462 vironmental policies should invest in improving the perceptions, or decreasing the costs, of  
463 proenvironmental behaviours. Achieving climate targets needs the right policies to be done  
464 and the informations that coupled human-environment models provide are crucial.

## 465 **Acknowledgements:**

466 We thank Sylvie Démurger, Jean-Stéphane Dhersion and the the team of the *Mission pour*  
467 *les Initiatives Transverses et Interdisciplinaires* at the French National Center for Scientific  
468 Research (CNRS) for the initial impetus and support to develop this research program. We are  
469 grateful for the stimulating work environment that the summer school organized by the Chair  
470 "Modélisation Mathématique et Biodiversité" has provided.

## 471 **Funding:**

472 This work was funded by a grant from the program 80PRIME of the French National Center  
473 for Scientific Research (CNRS). Funding was also provided by the iGLOBES Mobility Program  
474 of Paris Sciences & Lettres University and was partially funded by the Chair "Modélisation  
475 Mathématique et Biodiversité" of VEOLIA-Ecole Polytechnique-MNHN-F.X. JBA acknowl-  
476 edges support from the EUR FrontCog grant ANR-17-EURE-0017.

## 477 **References**

- 478 [1] Dorsa Amir, Matthew R Jordan, and David G Rand. "An uncertainty management per-  
479 spective on long-run impacts of adversity: The influence of childhood socioeconomic status  
480 on risk, time, and social preferences". In: *Journal of Experimental Social Psychology* 79  
481 (2018), pp. 217–226.
- 482 [2] James Andreoni, Nikos Nikiforakis, and Jan Stoop. *Are the rich more selfish than the*  
483 *poor, or do they just have more money? A natural field experiment*. Tech. rep. National  
484 Bureau of Economic Research, 2017.
- 485 [3] Robert S Baron, Joseph A Vandello, and Bethany Brunzman. "The forgotten variable  
486 in conformity research: Impact of task importance on social influence." In: *Journal of*  
487 *personality and social psychology* 71.5 (1996), p. 915.
- 488 [4] Chris T Bauch et al. "Early warning signals of regime shifts in coupled human–environment  
489 systems". In: *Proceedings of the National Academy of Sciences* 113.51 (2016), pp. 14560–  
490 14567.

- 491 [5] Mélusine Boon-Falleur et al. “Leveraging social cognition to promote effective climate  
492 change mitigation”. In: *Nature Climate Change* 12.4 (2022), pp. 332–338.
- 493 [6] Thomas M Bury, Chris T Bauch, and Madhur Anand. “Charting pathways to climate  
494 change mitigation in a coupled socio-climate model”. In: *PLoS computational biology* 15.6  
495 (2019), e1007000.
- 496 [7] Robert B Cialdini and Robert B Cialdini. *Influence: The psychology of persuasion*. Vol. 55.  
497 Collins New York, 2007.
- 498 [8] Susan Clayton et al. “Psychological research and global climate change”. In: *Nature cli-  
499 mate change* 5.7 (2015), pp. 640–646.
- 500 [9] Sara M Constantino and Elke U Weber. “Decision-making under the deep uncertainty of  
501 climate change: The psychological and political agency of narratives”. In: *Current Opinion  
502 in Psychology* 42 (2021), pp. 151–159.
- 503 [10] Simon D Donner and Jeremy McDaniels. “The influence of national temperature fluctua-  
504 tions on opinions about climate change in the US since 1990”. In: *Climatic change* 118.3  
505 (2013), pp. 537–550.
- 506 [11] Claire Ecotièrre et al. “Supplementary materials”. In: (2022).
- 507 [12] Joana Figueiredo and Henrique M Pereira. “Regime shifts in a socio-ecological model of  
508 farmland abandonment”. In: *Landscape ecology* 26.5 (2011), pp. 737–749.
- 509 [13] D. C. Funder. “Towards a resolution of the personality triad: Persons, situations, and  
510 behaviors”. In: *Journal of Research in Personality* 40 (2006), pp. 21–34.
- 511 [14] Robert Gifford. “The dragons of inaction: psychological barriers that limit climate change  
512 mitigation and adaptation.” In: *American psychologist* 66.4 (2011), p. 290.
- 513 [15] Robert Gifford, Karine Lacroix, and Angel Chen. “Understanding responses to climate  
514 change: Psychological barriers to mitigation and a new theory of behavioral choice”. In:  
515 *Psychology and climate change*. Elsevier, 2018, pp. 161–183.
- 516 [16] Aurore Grandin, Melusine Boon-Falleur, and Coralie Chevallier. “The belief-action gap  
517 in environmental psychology: How wide? How irrational?” In: (2021).
- 518 [17] Aurore Grandin et al. “Socioeconomic status, time preferences and pro-environmentalism”.  
519 In: *Journal of Environmental Psychology* 79 (2022), p. 101720.
- 520 [18] John Guckenheimer and Philip Holmes. *Nonlinear oscillations, dynamical systems, and  
521 bifurcations of vector fields*. Vol. 42. Springer Science & Business Media, 2013.
- 522 [19] Lawrence C Hamilton and Mary D Stampone. “Blowin’ in the wind: Short-term weather  
523 and belief in anthropogenic climate change”. In: *Weather, Climate, and Society* 5.2 (2013),  
524 pp. 112–119.
- 525 [20] Chad Hazlett and Matto Mildemberger. “Wildfire exposure increases pro-environment  
526 voting within democratic but not republican areas”. In: *American Political Science Review*  
527 114.4 (2020), pp. 1359–1365.

- 528 [21] Josef Hofbauer, Karl Sigmund, et al. *Evolutionary games and population dynamics*. Cam-  
529 bridge university press, 1998.
- 530 [22] Mehran Homayounfar, Rachata Muneeppeerakul, and John Anderies. “Resilience-performance  
531 trade-offs in managing social-ecological systems”. In: *Ecology and Society* 27.1 (2022).
- 532 [23] Clinton Innes, Madhur Anand, and Chris T Bauch. “The impact of human-environment  
533 interactions on the stability of forest-grassland mosaic ecosystems”. In: *Scientific reports*  
534 3.1 (2013), pp. 1–10.
- 535 [24] Pierre O Jacquet et al. “The ecological roots of human susceptibility to social influence:  
536 A pre-registered study investigating the impact of early-life adversity”. In: *Royal Society*  
537 *open science* 6.1 (2019), p. 180454.
- 538 [25] Martin Korndörfer, Boris Egloff, and Stefan C Schmukle. “A large scale test of the effect  
539 of social class on prosocial behavior”. In: *PloS one* 10.7 (2015), e0133193.
- 540 [26] Niels Lettinga et al. “Environmental adversity is associated with lower investment in  
541 collective actions”. In: *PloS one* 15.7 (2020), e0236715.
- 542 [27] Daniel Lim and David DeSteno. “Suffering and compassion: The links among adverse  
543 life experiences, empathy, compassion, and prosocial behavior.” In: *Emotion* 16.2 (2016),  
544 p. 175.
- 545 [28] Joshua Linn. “The rebound effect for passenger vehicles”. In: *The Energy Journal* 37.2  
546 (2016).
- 547 [29] Jean-Denis Mathias et al. “Exploring non-linear transition pathways in social-ecological  
548 systems”. In: *Scientific reports* 10.1 (2020), pp. 1–12.
- 549 [30] Michael E McCullough et al. “Harsh childhood environmental characteristics predict ex-  
550 ploitation and retaliation in humans”. In: *Proceedings of the Royal Society B: Biological*  
551 *Sciences* 280.1750 (2013), p. 20122104.
- 552 [31] Hugo Mell, Nicolas Baumard, and Jean-Baptiste André. “Time is money. Waiting costs  
553 explain why selection favors steeper time discounting in deprived environments”. In: *Evo-*  
554 *lution and Human Behavior* 42.4 (2021), pp. 379–387.
- 555 [32] Manfred Milinski et al. “The collective-risk social dilemma and the prevention of simulated  
556 dangerous climate change”. In: *Proceedings of the National Academy of Sciences* 105.7  
557 (2008), pp. 2291–2294.
- 558 [33] Olivier Morin. “Is cooperation a maladaptive by-product of social learning? The docility  
559 hypothesis reconsidered”. In: *Biological Theory* 9.3 (2014), pp. 286–295.
- 560 [34] Daniel Nettle, Agathe Colléony, and Maria Cockerill. “Variation in cooperative behaviour  
561 within a single city”. In: *PloS one* 6.10 (2011), e26922.
- 562 [35] Karine Nyborg. “No man is an island: social coordination and the environment”. In:  
563 *Environmental and Resource Economics* 76.1 (2020), pp. 177–193.

- 564 [36] Paul K Piff et al. “Having less, giving more: the influence of social class on prosocial  
565 behavior.” In: *Journal of personality and social psychology* 99.5 (2010), p. 771.
- 566 [37] Lou Safra et al. “Neighborhood deprivation negatively impacts children’s prosocial be-  
567 havior”. In: *Frontiers in psychology* 7 (2016), p. 1760.
- 568 [38] Caroline Schill et al. “A more dynamic understanding of human behaviour for the An-  
569 thropocene”. In: *Nature Sustainability* 2.12 (2019), pp. 1075–1082.
- 570 [39] Stefan C Schmukle, Martin Korndörfer, and Boris Egloff. “No evidence that economic  
571 inequality moderates the effect of income on generosity”. In: *Proceedings of the National  
572 Academy of Sciences* 116.20 (2019), pp. 9790–9795.
- 573 [40] Ram P Sigdel, Madhur Anand, and Chris T Bauch. “Competition between injunctive  
574 social norms and conservation priorities gives rise to complex dynamics in a model of forest  
575 growth and opinion dynamics”. In: *Journal of theoretical biology* 432 (2017), pp. 132–140.
- 576 [41] Murugesu Sivapalan and Günter Blöschl. “Time scale interactions and the coevolution of  
577 humans and water”. In: *Water Resources Research* 51.9 (2015), pp. 6988–7022.
- 578 [42] Angelos Stamos et al. “Having less, giving more? Two preregistered replications of the  
579 relationship between social class and prosocial behavior”. In: *Journal of Research in Per-  
580 sonality* 84 (2020), p. 103902.
- 581 [43] Ralph H Turner. “Personality in society: Social psychology’s contribution to sociology”.  
582 In: *Social Psychology Quarterly* (1988), pp. 1–10.
- 583 [44] Junhui Wu et al. “Life history strategy and human cooperation in economic games”. In:  
584 *Evolution and Human Behavior* 38.4 (2017), pp. 496–505.
- 585 [45] Elena Zwirner and Nichola Raihani. “Neighbourhood wealth, not urbanicity, predicts  
586 prosociality towards strangers”. In: *Proceedings of the Royal Society B* 287.1936 (2020),  
587 p. 20201359.

| Notations                              | Description                                                                              | Default parameter value |
|----------------------------------------|------------------------------------------------------------------------------------------|-------------------------|
| Behaviours $A$ vs. $B$                 | Active vs. Baseline behaviours                                                           |                         |
| $N$                                    | Size of the population                                                                   |                         |
| $N_t^{A,N}, N_t^{B,N}$                 | Number of individuals with behaviour $A, B$ at time $t$                                  |                         |
| $X_t^N, E_t^N$                         | Frequency of individuals with behaviour $A$ and Environment state at time $t$            |                         |
| $x_t, e_t$                             | Deterministic frequency individuals with behaviour $A$ and environment state at time $t$ |                         |
| $\kappa$                               | Encounter rate                                                                           | 1                       |
| $\tau$                                 | Individual sensitivity to the environment                                                |                         |
| $\ell$                                 | Environmental reactivity                                                                 |                         |
| $\gamma_A$ (resp. $\gamma_B$ )         | Payoff of behaviour $A$ (resp. $B$ )                                                     | $\gamma_B = 1$          |
| $\delta_A$ (resp. $\delta_B$ )         | Social pressure of behaviour $A$ (resp. $B$ )                                            | $\delta_B = 0.5$        |
| $l_A$ (resp. $l_B$ )                   | Individual environmental impact of behaviour $A$ (resp. $B$ )                            | $l_B = 1$               |
| $\beta = \gamma_A - \gamma_B$          | Payoff differential                                                                      |                         |
| $\frac{\delta_B}{\delta_A + \delta_B}$ | Social norm threshold (SNT)                                                              |                         |
| $l_A - l_B$                            | Environmental impact differential                                                        |                         |

Table 1: Summary of notations

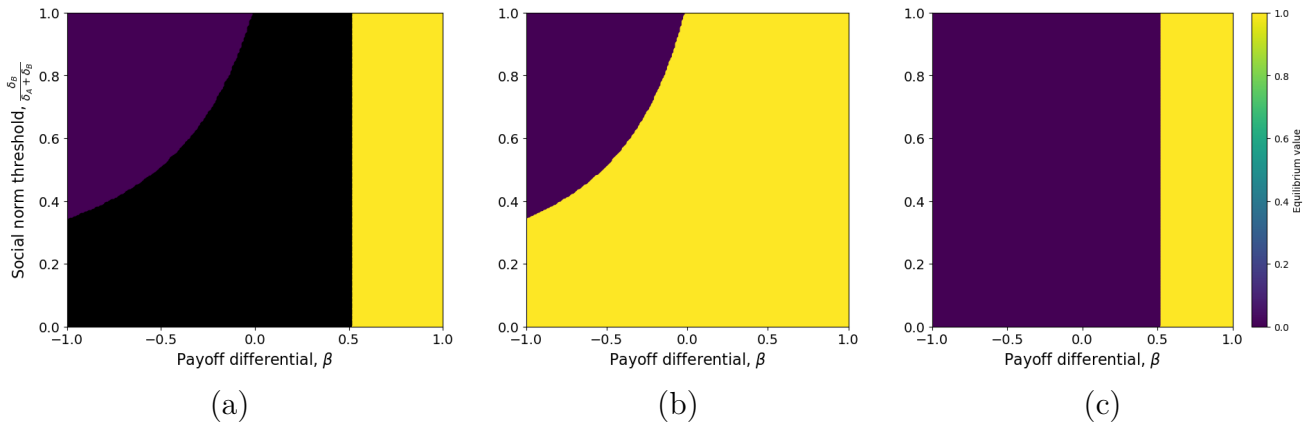

Figure 1: **Frequency of active behaviour at equilibrium in the absence of environmental feedback (Eq. (17)), with respect to the payoff differential ( $\beta$ ) and social norm threshold ( $\frac{\delta_B}{\delta_A + \delta_B}$ ).** (a) Bistability occurs in the black filled area (depending on the initial conditions, the equilibrium is either  $x^* = 0$  or  $x^* = 1$ ). (b) The upper equilibrium value ( $x^* = 1$ ) is plotted across the bistability area. (c) The lower equilibrium value ( $x^* = 0$ ) is plotted across the bistability area. Other parameters:  $\kappa = 1$ ,  $\tau = 0$ ,  $\ell = 0.1$ ,  $l_B = 1$  et  $\delta_B = 0.5$ .

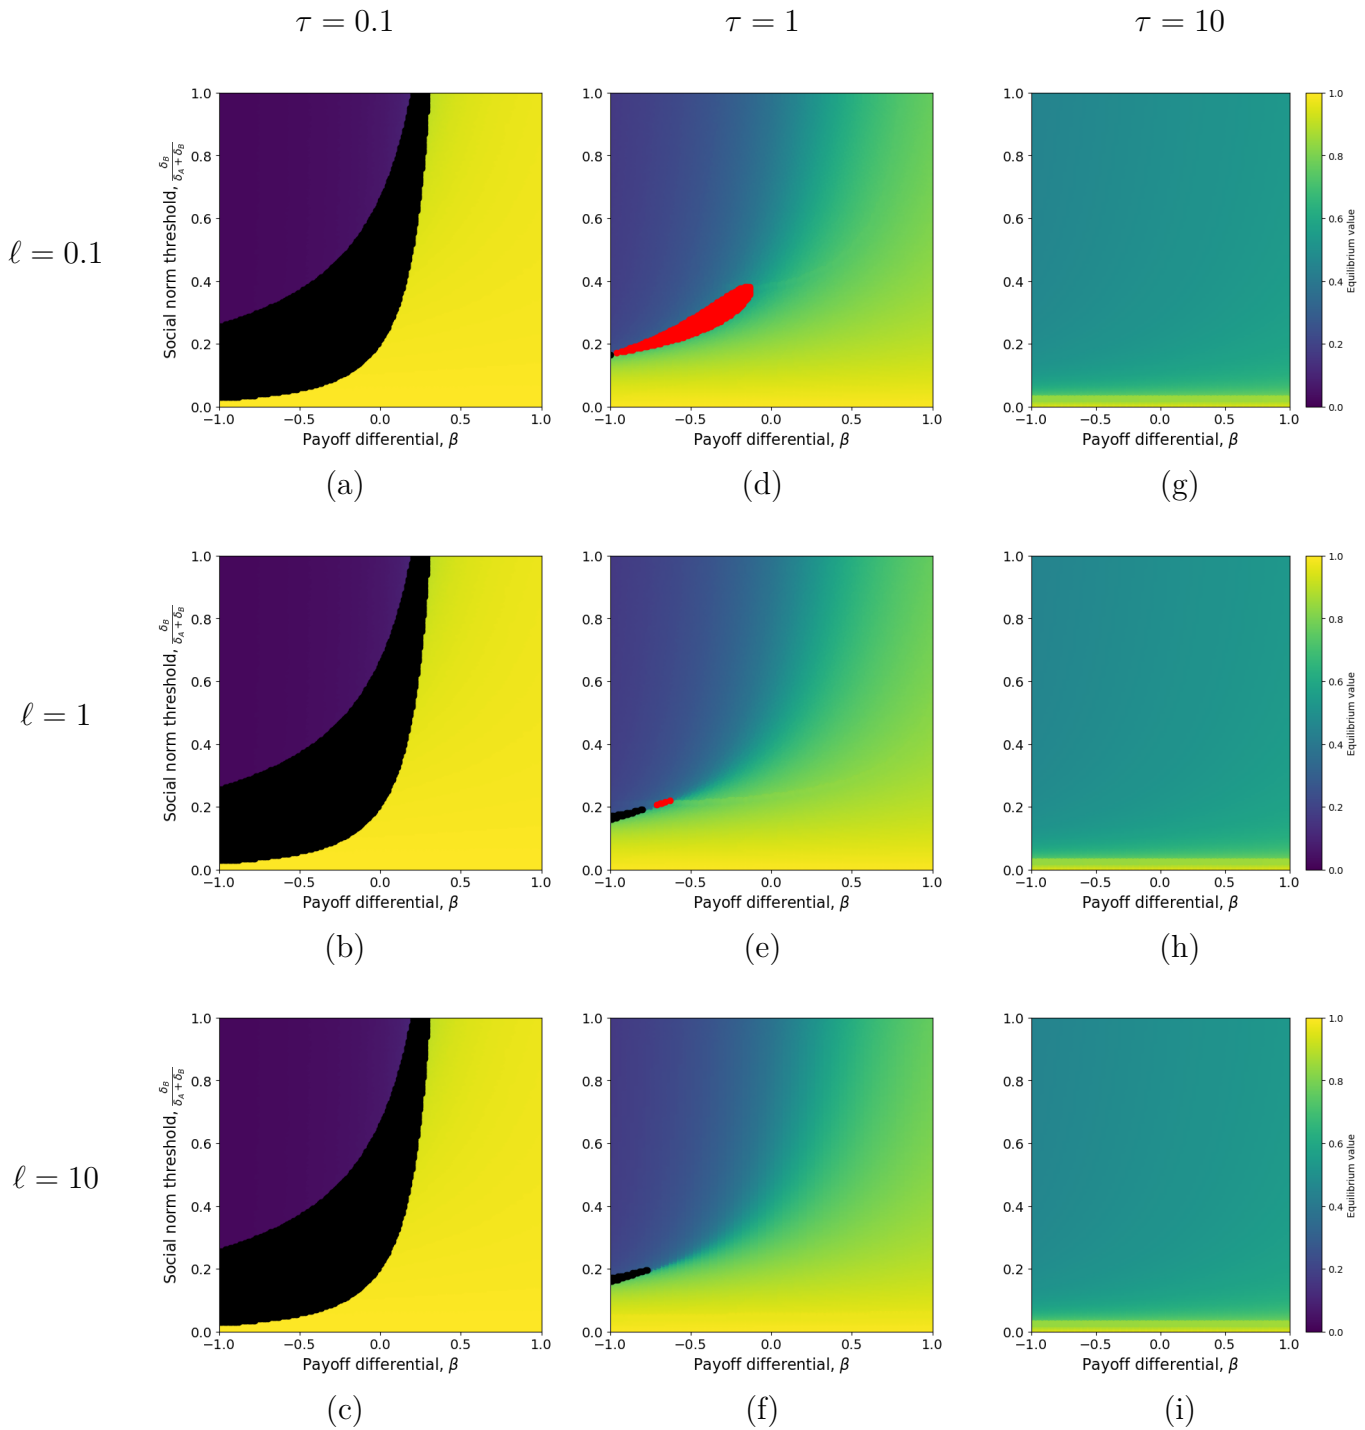

Figure 2: **Frequency of active behaviour at equilibrium in the presence of environmental feedback (Eq. 18), with respect to the payoff differential ( $\beta$ ) and social norm threshold ( $\frac{\delta_B}{\delta_A + \delta_B}$ ), for low to high individual sentivity to the environment ( $\tau$ ) and environmental reactivity ( $\ell$ ).** Environmental reactivity takes on values  $\ell = 0.1, 1$  and  $10$  with  $\tau = 0.1$  in panels a-c,  $\tau = 1$  in d-f, and  $\tau = 10$  in g-i. Bistability occurs in the black filled areas. Stable limit cycles occur in the red filled areas. The environmental impact differential is fixed ( $l_B = 1, l_A = 0.7$ ). Other parameters:  $\kappa = 1$  et  $\delta_B = 0.5$ .



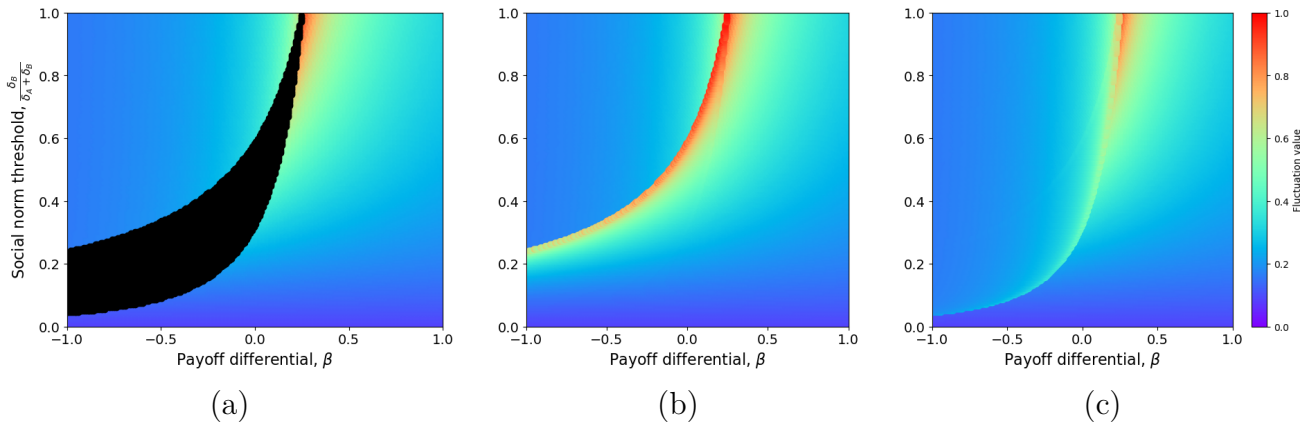

Figure 3: **Behavioural inconsistency due to stochasticity at stationary state.** The variance of the asymptotic fluctuation around the equilibrium  $x^*$  is given by Eq. 15 . (a) Variance outside the parameter region of bistability. (b) Variance calculated in the bistability parameter region for fluctuations around the upper stable equilibrium  $x^*$  (close to one). (c) Variance calculated in the bistability parameter region for fluctuations around the lower stable equilibrium  $x^*$  (close to zero). Other parameters:  $\kappa = 1$ ,  $\tau = 1$ ,  $\ell = 0.1$ ,  $l_B = 1$  et  $\delta_B = 0.5$ .

588

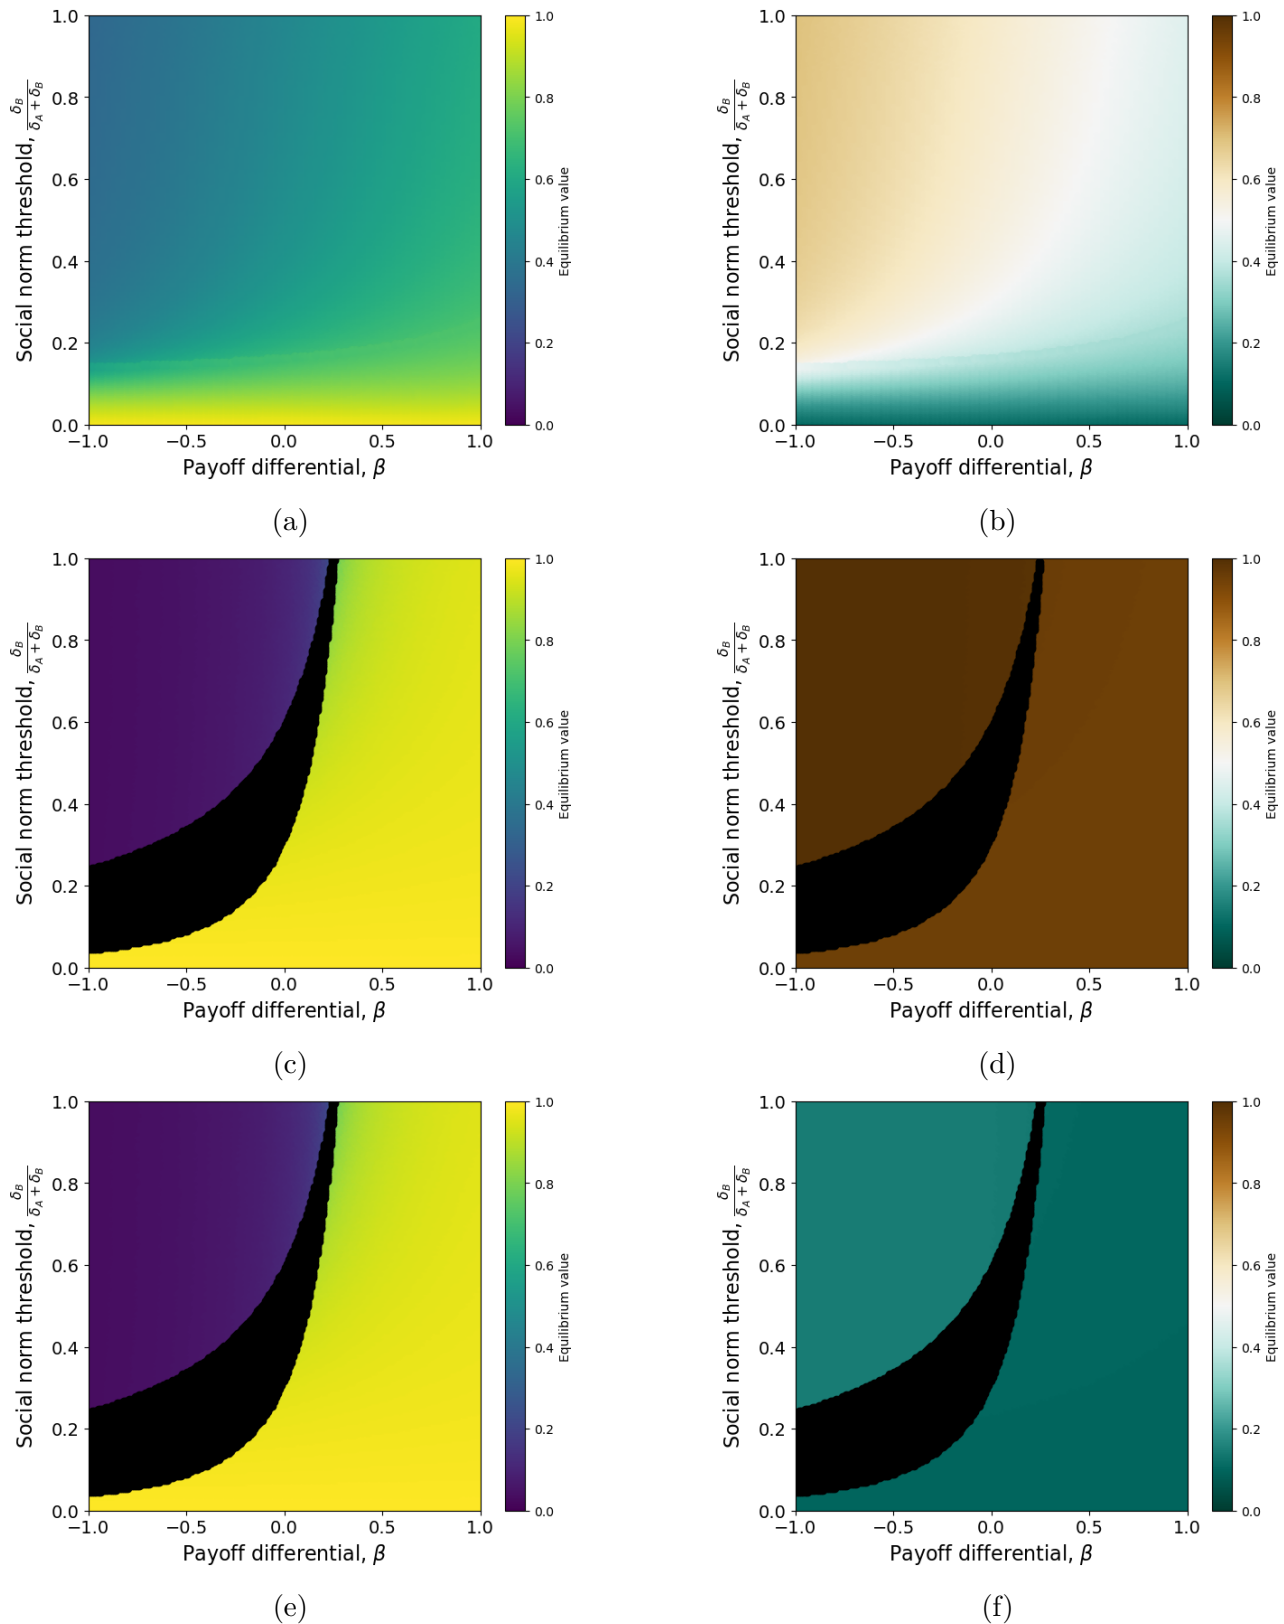

Figure 4: Influence of the environmental impact differential,  $l_B - l_A$ , on the frequency of active behaviour (a, c, e) and perceived environmental state (b, d, f) at equilibrium. For (a) and (b), the parameters are  $l_B = 1$  and  $l_A = 0.1$ . For (c) and (d),  $l_B = 1$  and  $l_A = 0.95$ . For (e) and (f),  $l_B = 0.15$  and  $l_A = 0.1$ . Other parameters:  $\kappa = 1$ ,  $\tau = 1$ ,  $\ell = 0.1$  et  $\delta_B = 0.5$ .
